# Supplementary material for: Luseogliflozin inhibits high glucose-induced TGF-β2 expression in mouse cardiomyocytes by suppressing NHE-1 activity
Source: PubMed Central journal article supplement — J Int Med Res. 2022 May 5;50(5):03000605221097490. doi: 10.1177/03000605221097490 (PMC9082751; doi:10.1177/03000605221097490), 2022-05-05

**Supplemental Fig. 1. Proposed mechanism underlying direct effect of luseogliflozin on high glucose-exposed cardiomyocytes.**

NHE-1, sodium-hydrogen exchanger-1; NFAT, nuclear factor of activated T-cells; TGF- $\beta$ 2, transforming growth factor- $\beta$ 2.

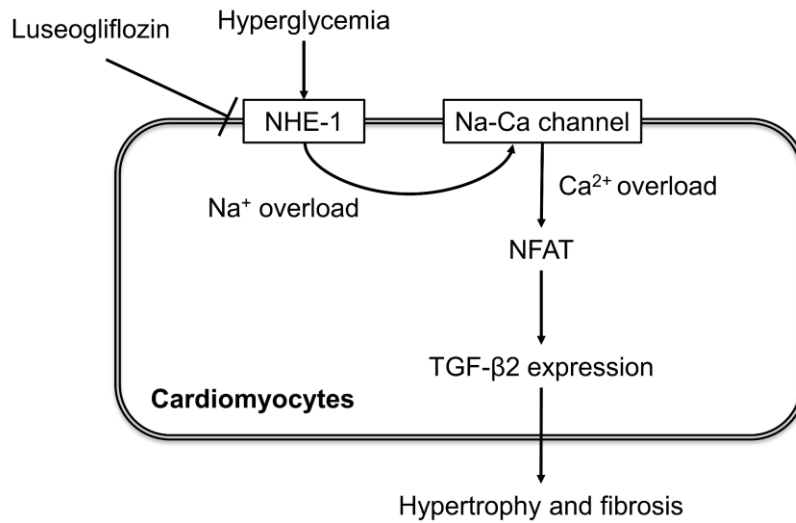

Supplement: sj-pdf-1-imr-10.1177_03000605221097490.pdf [file sj-pdf-1-imr-10.1177_03000605221097490.pdf]
